# Supplementary material for: Broadband laser polarization control with aligned carbon nanotubes
Source: Royal Society of Chemistry journal article supplement (doi:10.1039/c5nr01904d), 2015-01-01
Supplement: c5nr01904d1.pdf [file c5nr01904d1.pdf]

Cite this: DOI: 10.1039/c0xx00000x

www.rsc.org/xxxxxx

## SUPPORTING INFORMATION

### Broadband laser polarization control with aligned carbon nanotubes

He Yang<sup>a†</sup>, Bo Fu<sup>a,b†</sup>, Diao Li<sup>a,c†</sup>, Ying Tian<sup>d</sup>, Ya Chen<sup>a</sup>, Marco Mattila<sup>a</sup>, Zhenzhong Yong<sup>e</sup>, Ru Li<sup>e</sup>, Abdou Hassanien<sup>f</sup>, Changxi Yang<sup>b</sup>, Ilkka Tittonen<sup>a</sup>, Zhaoyu Ren<sup>c</sup>, Jingtao Bai<sup>c</sup>, Qingwen Li<sup>e</sup>, Esko I. Kauppinen<sup>d</sup>, Harri Lipsanen<sup>a</sup>, and Zhipei Sun<sup>\*a</sup>

<sup>5</sup> Received (in XXX, XXX) Xth XXXXXXXXX 20XX, Accepted Xth XXXXXXXXX 20XX

DOI: 10.1039/b000000x

#### The polarization performance depends on the ACNT film thickness:

In order to optimize the polarization performance, the 1.5  $\mu\text{m}$  laser system was utilized to test the DOP and ER with different ACNT film thicknesses. The result shows that thicker ACNT film gives better performance, and the output performance saturates with the  $\sim 300$  nm film, illustrated in Fig. S1. Therefore, in our experiment, we selected  $\sim 300$  nm thick film to get the experimental results discussed in the main text. The highest DOP and ER value are obtained to be  $\sim 86\%$  and 10.2 dB respectively, which are in correspondence with the data in the paper.

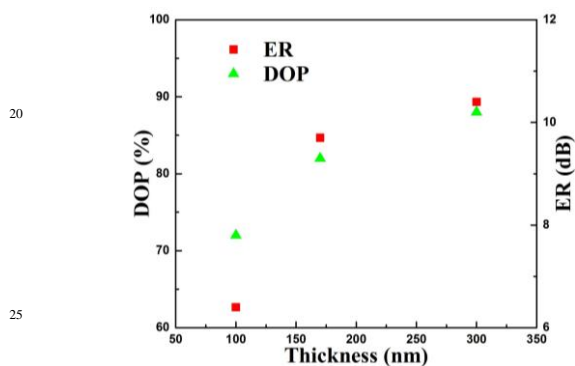

Fig. S1 The relationship between the ACNT film thickness and the polarization performance (DOP and ER).

#### Polarization performance comparison between ACNT device and prism based polarizer:

We compared our ACNT laser performance with a traditional prism based polarizer (Thorlabs, GL10), as shown in Fig. S2. It shows that the polarization performance with the prism is slightly higher ( $\sim 7\%$  at 1  $\mu\text{m}$ ,  $\sim 8\%$  at 1.5  $\mu\text{m}$ ) than that from the laser with the ACNT device. This demonstrates that our ACNT device performance is very comparable to the prism based polarizer, for laser polarization control (and with a broad operation bandwidth (at both 1 and 1.5  $\mu\text{m}$ )). Note that our ACNT fabrication method is compatible to other photonic devices (e.g., fibers and silicon devices), which can offer huge flexibility to be integrated into various photonic platforms (e.g., waveguides) for a large range of photonics applications.

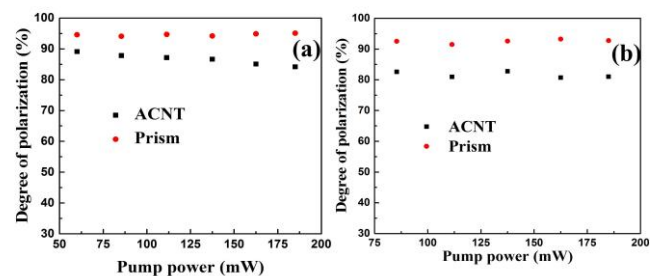

Fig. S2 DOP performance comparison between our ACNT device and a prism based polarizer in (a) 1  $\mu\text{m}$ , and (b) 1.5  $\mu\text{m}$  laser systems.

#### Gain coefficient of the gain fiber and its comparison with ACNT absorption:

The gain coefficients of our Yb-doped and Er-doped fibers were tested, illustrated in Fig. S3. The value ranges from 2 dB to 25 dB for the Yb-doped fiber, and from 3 dB to 17 dB for the Er-doped fiber.

We also compare the relationship between the gain coefficient and the absorbance of ACNT, shown in Fig. S4. It appears that the gain ( $\sim 1000\%$  and  $\sim 1580\%$  at 1  $\mu\text{m}$  and 1.5  $\mu\text{m}$  laser respectively, under the pump power of 75 mW) is much higher ( $> \sim 5000$  times) than the typical absorption of our ACNT device.

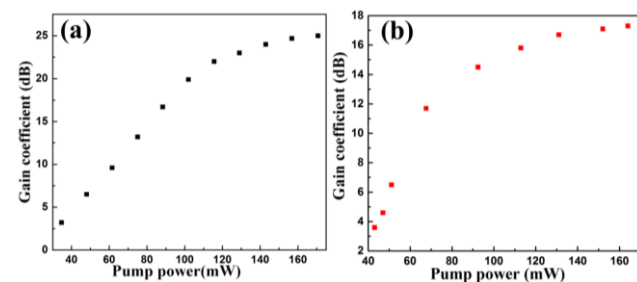

Fig. S3 The gain coefficient for our (a) Yb-doped and (b) Er-doped fibers, as a function of pump power.

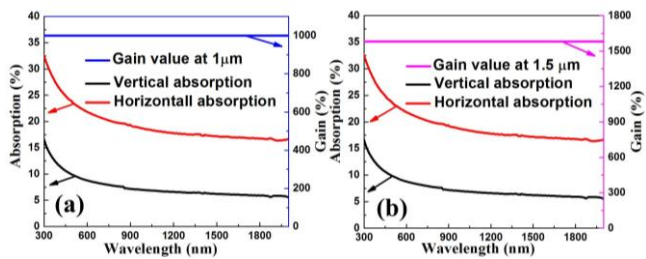

55

Fig. S4 The absorption at vertical and horizontal directions, and the gain value of the gain medium under pump power of 75 mW (corresponding to the best polarization performance output) at 1 μm (a) and 1.5 μm (b).

5

10

15

20

25

30

35

40

45

50
